# Supplementary material for: Phosphorylation of NF-κBp65 drives inflammation-mediated hepatocellular carcinogenesis and is a novel therapeutic target
Source: PubMed Central journal article supplement (PMC8359590; doi:10.1186/s13046-021-02062-x), 2021-08-11
Supplement: 13046_2021_2062_MOESM1_ESM.pdf [file 13046_2021_2062_MOESM1_ESM.pdf]

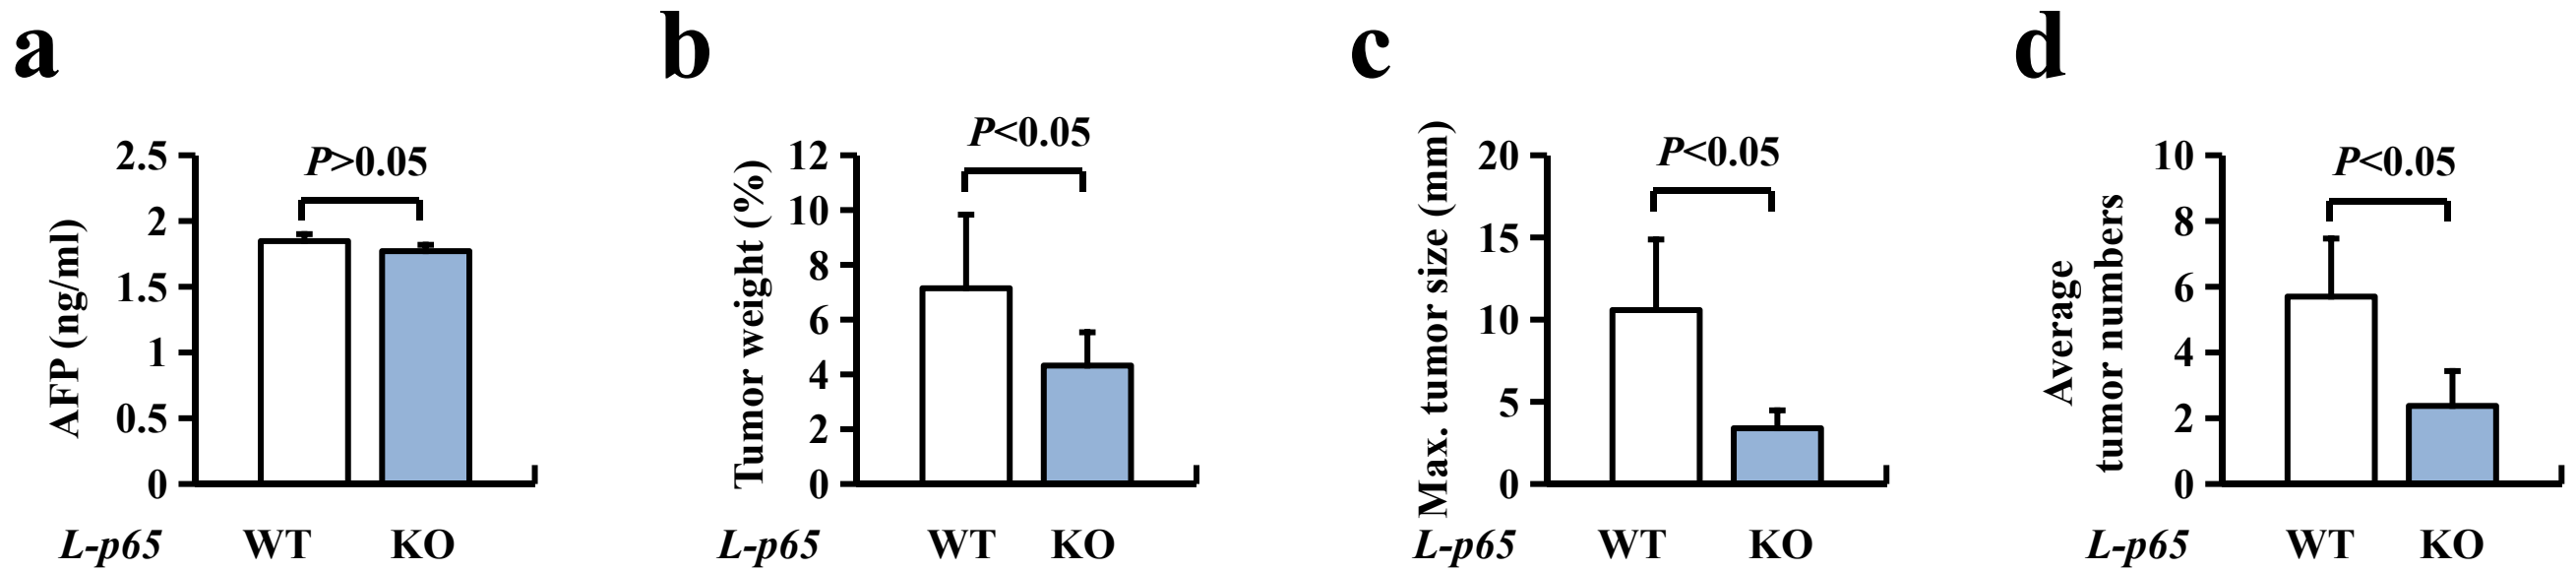

**Fig. S1 Deficiency of hepatocytes p65 attenuated hepatocellular carcinogenesis in mice. (a)** AFP levels of WT and L-p65-KO mice. **(b)** Quantification of average liver weight versus body weight in WT and L-p65-KO mice. **(c)** Maximal size of liver tumors measured by a caliper. **(d)** Average tumor numbers at 9 months. All values are mean  $\pm$  SD (n=10 for each group).  $P < 0.05$  by using Student's *t*-test.
