# Supplementary material for: Phosphorylation of NF-κBp65 drives inflammation-mediated hepatocellular carcinogenesis and is a novel therapeutic target
Source: PubMed Central journal article supplement (PMC8359590; doi:10.1186/s13046-021-02062-x), 2021-08-11
Supplement: 13046_2021_2062_MOESM2_ESM.pdf [file 13046_2021_2062_MOESM2_ESM.pdf]

**a**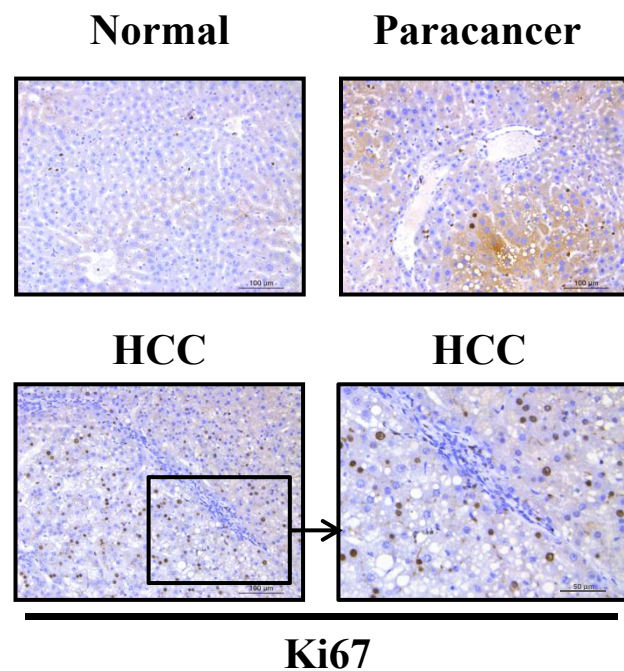**b**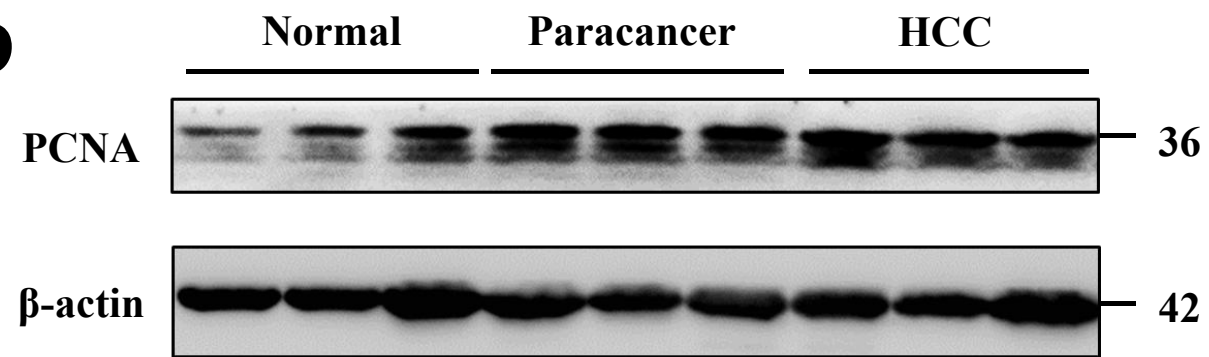**c**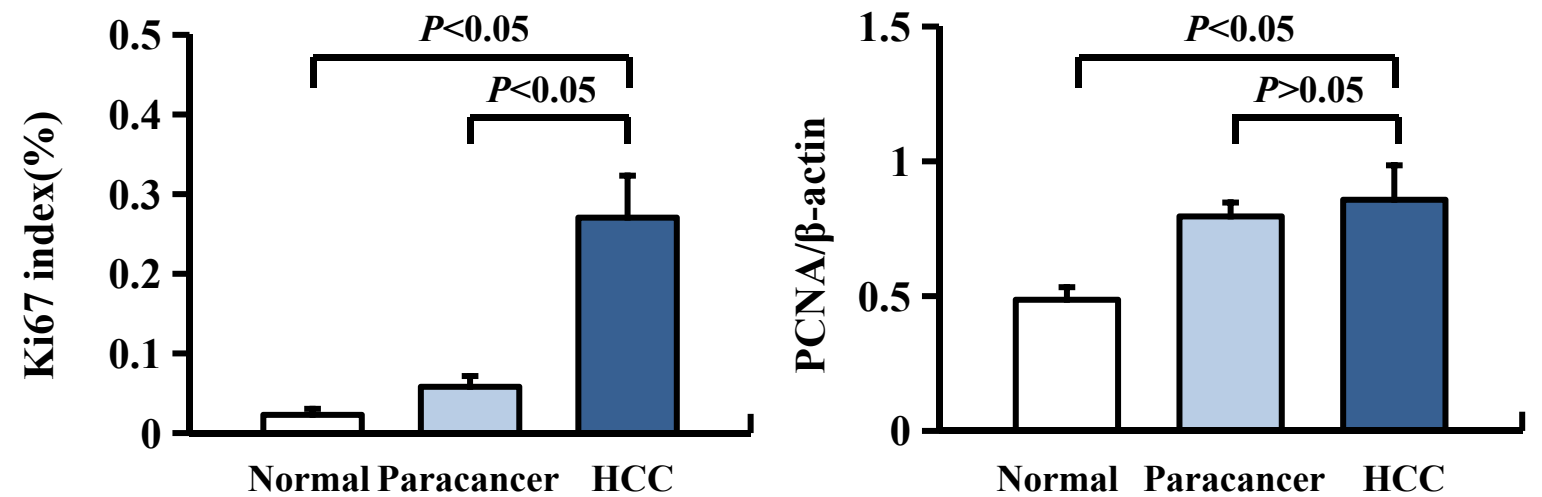

**Fig. S2 Cell proliferation was increased in DEN-induced HCC mouse model. (a)**

Representative images of ki67 staining in DEN-induced HCC. **(b)** PCNA expression

in mice liver was determined by western blotting. **(c)** Ki67 index and PCNA relative

protein level was scored. All values are mean  $\pm$  SD (n=6 in each group).  $P < 0.05$  by

using Student's *t*-test.
