# Supplementary material for: Phosphorylation of NF-κBp65 drives inflammation-mediated hepatocellular carcinogenesis and is a novel therapeutic target
Source: PubMed Central journal article supplement (PMC8359590; doi:10.1186/s13046-021-02062-x), 2021-08-11
Supplement: 13046_2021_2062_MOESM3_ESM.pdf [file 13046_2021_2062_MOESM3_ESM.pdf]

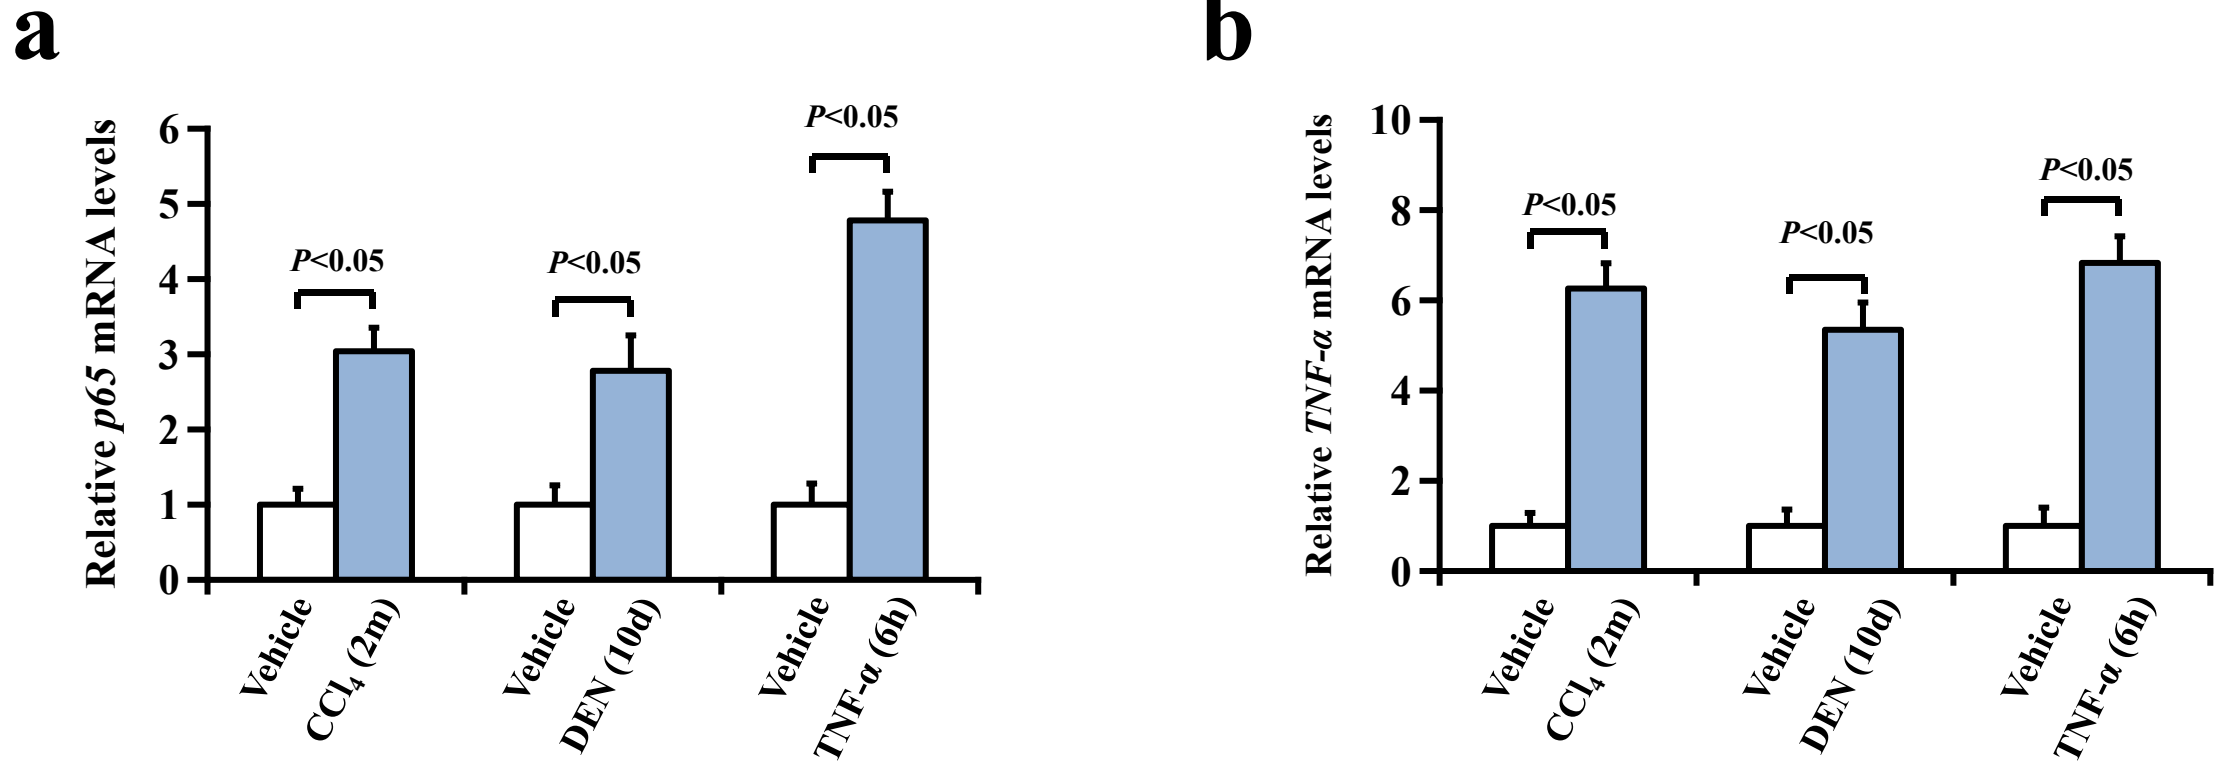

**Fig. S3** The mRNA levels of *p65* and *TNF-α* in the acute inflammatory mouse models were measured by Real time-PCR. **(a)** The mRNA level of *p65* was elevated in liver tissues after intraperitoneal injection of CCl<sub>4</sub> for 2 months, DEN for 10 days, or TNF-α (40 μg/kg) for 6h. **(b)** The *TNF-α* mRNA level was elevated in liver tissues after intraperitoneal injection of CCl<sub>4</sub> for 2 months, DEN for 10 days, or TNF-α (40 μg/kg) for 6h. All values are mean ± SD (n=6 in each group). *P*<0.05 by using Student's *t*-test.
